# Supplementary material for: Kinetic Characteristics of Curcumin and Germacrone in Rat and Human Liver Microsomes: Involvement of CYP Enzymes
Source: MDPI journal article supplement (doi:10.3390/molecules27144482), 2022-07-14
Supplement: s1 [file s1]

**Table S1.** The matrix-matched calibration and solvent calibration (0.01–120  $\mu\text{M}$ ) (mean  $\pm$  SD,  $n = 3$ ).

| Compd      | Matrix  | Regressive equation    | Correlation coefficient ( $r^2$ ) | LOD ( $\mu\text{M}$ ) | LOQ ( $\mu\text{M}$ ) |
|------------|---------|------------------------|-----------------------------------|-----------------------|-----------------------|
| Curcumin   | solvent | $y = 5603246x + 12385$ | 0.9992                            |                       |                       |
|            | RLMs    | $y = 5324486x + 23266$ | 0.9936                            | 0.018                 | 0.15                  |
|            | HLMs    | $y = 5412463x + 26482$ | 0.9958                            | 0.025                 | 0.13                  |
| Germacrone | solvent | $y = 2846581x + 28365$ | 0.9998                            |                       |                       |
|            | RLMs    | $y = 2634468x + 26383$ | 0.9988                            | 0.032                 | 0.09                  |
|            | HLMs    | $y = 2693386x + 24368$ | 0.9962                            | 0.026                 | 0.12                  |

**Table S2.** Accuracy and precision of curcumin and germacrone in RLMs and HLMs (mean  $\pm$  SD,  $n = 3$ ).

| Compd      | Concn ( $\mu\text{M}$ ) | Intra-day               |              |         | Inter-day               |              |         |
|------------|-------------------------|-------------------------|--------------|---------|-------------------------|--------------|---------|
|            |                         | Concn ( $\mu\text{M}$ ) | Accuracy (%) | RSD (%) | Concn ( $\mu\text{M}$ ) | Accuracy (%) | RSD (%) |
| Curcumin   | 3 (R)                   | $2.932 \pm 0.12$        | 96.87        | 1.22    | $2.940 \pm 0.38$        | 92.31        | 2.98    |
|            | 3 (H)                   | $2.896 \pm 0.36$        | 94.63        | 1.08    | $2.961 \pm 0.43$        | 93.62        | 2.34    |
|            | 10 (R)                  | $9.561 \pm 0.38$        | 93.56        | 1.92    | $9.534 \pm 0.48$        | 89.67        | 2.83    |
|            | 10 (H)                  | $9.743 \pm 0.12$        | 93.28        | 2.13    | $9.463 \pm 0.38$        | 91.23        | 2.62    |
|            | 80 (R)                  | $79.36 \pm 0.68$        | 98.26        | 3.04    | $79.29 \pm 0.57$        | 94.53        | 2.12    |
|            | 80 (H)                  | $79.42 \pm 0.23$        | 96.47        | 2.52    | $79.53 \pm 0.23$        | 93.25        | 2.36    |
| Germacrone | 3 (R)                   | $2.945 \pm 0.72$        | 91.32        | 2.34    | $2.864 \pm 0.77$        | 89.43        | 1.96    |
|            | 3 (H)                   | $2.936 \pm 0.82$        | 93.38        | 2.19    | $2.832 \pm 0.98$        | 90.68        | 1.89    |
|            | 10 (R)                  | $9.123 \pm 0.24$        | 89.64        | 1.31    | $9.425 \pm 0.72$        | 91.20        | 2.32    |
|            | 10 (H)                  | $9.423 \pm 0.36$        | 90.26        | 1.56    | $9.332 \pm 0.64$        | 92.32        | 1.97    |
|            | 80 (R)                  | $78.63 \pm 0.32$        | 85.53        | 1.84    | $79.12 \pm 0.64$        | 88.47        | 1.71    |
|            | 80 (H)                  | $79.32 \pm 0.13$        | 88.42        | 2.03    | $79.43 \pm 0.12$        | 95.43        | 2.32    |

Note: R meant RLMs and H meant HLMs

**Table S3.** The recovery of curcumin and germacrone (mean  $\pm$  SD,  $n = 3$ ).

| Matrix | Concn ( $\mu\text{M}$ ) | Curcumin          |         | Germacrone        |         |
|--------|-------------------------|-------------------|---------|-------------------|---------|
|        |                         | Accuracy (%)      | RSD (%) | Accuracy (%)      | RSD (%) |
| RLMs   | 3.00                    | $95.36 \pm 3.65$  | 3.42    | $98.96 \pm 3.87$  | 2.65    |
|        | 10.00                   | $97.36 \pm 2.32$  | 2.37    | $99.96 \pm 1.23$  | 1.56    |
|        | 80.00                   | $95.67 \pm 4.62$  | 2.12    | $98.63 \pm 3.26$  | 2.67    |
| HLMs   | 3.00                    | $98.12 \pm 3.24$  | 2.72    | $102.32 \pm 1.84$ | 3.42    |
|        | 10.00                   | $97.12 \pm 2.86$  | 1.92    | $99.23 \pm 1.12$  | 2.34    |
|        | 80.00                   | $100.46 \pm 2.68$ | 2.02    | $98.68 \pm 1.68$  | 2.63    |
